# Supplementary material
Source: MDPI journal article supplement (https://www.mdpi.com/2673-7256/2/2/24)
Supplement: s1 [file s1]

# Solution and Solid-State Optical Properties of Trifluoromethylated 5-(alkyl/aryl/heteroaryl)-2-methyl-pyrazolo[1,5-*a*]pyrimidine System

Felipe S. Stefanello <sup>1</sup>, Jean C. B. Vieira<sup>1</sup>, Juliane N. Araújo<sup>1</sup>, Vitória B. Souza<sup>2</sup>, Clarissa P. Frizzo<sup>1</sup>, Marcos A. P. Martins<sup>1</sup>, Nilo Zanatta<sup>1</sup>, Bernardo A. Iglesias<sup>\*2</sup>, and Helio G. Bonacorso<sup>1\*</sup>

<sup>1</sup> Núcleo de Química de Heterociclos (NUQUIMHE), Departamento de Química, Universidade Federal de Santa Maria, 97105-900 – Santa Maria, RS – Brazil.

<sup>2</sup> Laboratório de Bioinorgânica e Materiais Porfirínicos, Departamento de Química, Universidade Federal de Santa Maria, 97105-900 – Santa Maria, RS – Brazil.

\* Corresponding Authors. E-mail addresses: helio.bonacorso@ufsm.br (H.G. Bonacorso) and bernardopgq@gmail.com (B.A. Iglesias)

|                                |    |
|--------------------------------|----|
| 1. General.....                | 2  |
| 2. NMR Spectra .....           | 4  |
| 3. Photophysical analysis..... | 8  |
| 4. Thermal analysis.....       | 18 |
| 5. HRMS analysis .....         | 22 |
| 6. References.....             | 23 |

## 1. General

$^1\text{H}$  and  $^{13}\text{C}$  NMR spectra were acquired on a Bruker Avance III 600 MHz (**5a-q**) spectrometers for one-dimensional experiments, with 5-mm sample tubes, 298 K, and digital resolution of 0.01 ppm, in  $\text{CDCl}_3$  as solvent, and using TMS as the internal reference. All spectra can be found in Figures S1–S8 in the *Supplementary information*. All results are reported with the chemical shift ( $\delta$ ), multiplicity, integration, and coupling constant (Hz). The following abbreviations were used to explain multiplicities: s = singlet, d = doublet, t = triplet, q = quartet, m = multiplet, and dd = double doublet. All NMR chemical shifts were reported in parts per million, which is relative to the internal reference. The HRMS analyses were performed on a hybrid high-resolution and high-accuracy (5  $\mu\text{L/L}$ ) micrOTOF-Q mass spectrometer (Bruker Scientific®, Billerica, MA, USA) at (Caxias do Sul University, UCS, Brazil) (Figures S34–S35) [1].

Electronic UV-Vis absorption analysis of compounds in  $\text{CH}_3\text{CN}$ ,  $\text{CHCl}_3$ , THF, toluene, EtOH, and DMSO solutions were done with a Shimadzu UV2600 spectrophotometer (data interval of 1.0 nm) at 250 to 500 nm range. Steady-state emission fluorescence analysis of samples in  $\text{CH}_3\text{CN}$ ,  $\text{CHCl}_3$ , THF, toluene, EtOH, and DMSO solutions were measured with a Varian Cary50 fluorescence spectrophotometer (slit of 5.0 mm; em/exc) and corrected according to the manufacturer's instructions. Fluorescence quantum yield values ( $\Phi_{\text{fl}}$ ) of the compounds in solution were determined by comparing the corrected fluorescence spectra with that of 9,10-diphenylanthracene (DPA) in chloroform ( $\Phi_{\text{fl}} = 0.65$ ,  $\lambda_{\text{ex}} = 366$  nm) as the standard for the fluorescence yield. All spectra can be found in Figures S9–S25 in this *Supplementary information*.

Thermogravimetric analyses (TGA) were performed using a TGA Q5000 instrument (TA Instruments Inc., USA) at a heating rate of 10  $^{\circ}\text{C min}^{-1}$ , from 40  $^{\circ}\text{C}$  to 600  $^{\circ}\text{C}$  under a  $\text{N}_2$  flux of 25  $\text{mL min}^{-1}$ . The masses were approximately 1 mg for all samples. Data analysis was performed using the OriginPro 8.5 software. The confirmation of calibration of apparatus before analysis was done with  $\text{CaC}_2\text{O}_4 \cdot \text{H}_2\text{O}$  (99.9%). All curves of TGA can be found in Figures S26–S29 in this *Supplementary information*.

Differential scanning calorimetry (DSC) analysis were carried out using a Q2000 DSC calorimeter (TA Instruments, USA) equipped with an RCS refrigeration accessory,

and with N<sub>2</sub> as purge gas (50 mL min<sup>-1</sup>). The heating rate used was 5 °C min<sup>-1</sup>. The calibration of instruments in standard DSC mode was verified with indium (99.99%). The masses of the samples (1–5 mg) were weighed on a Sartorius balance (M500P) with a precision of ±0.001 mg. All samples were subjected to three heating–cooling cycles, as follows: 25 to 250 °C. DSC curves of 3b and 3d can be found in [Figures S30–S33](#) in this *Supplementary information*.

## 2. NMR Spectra

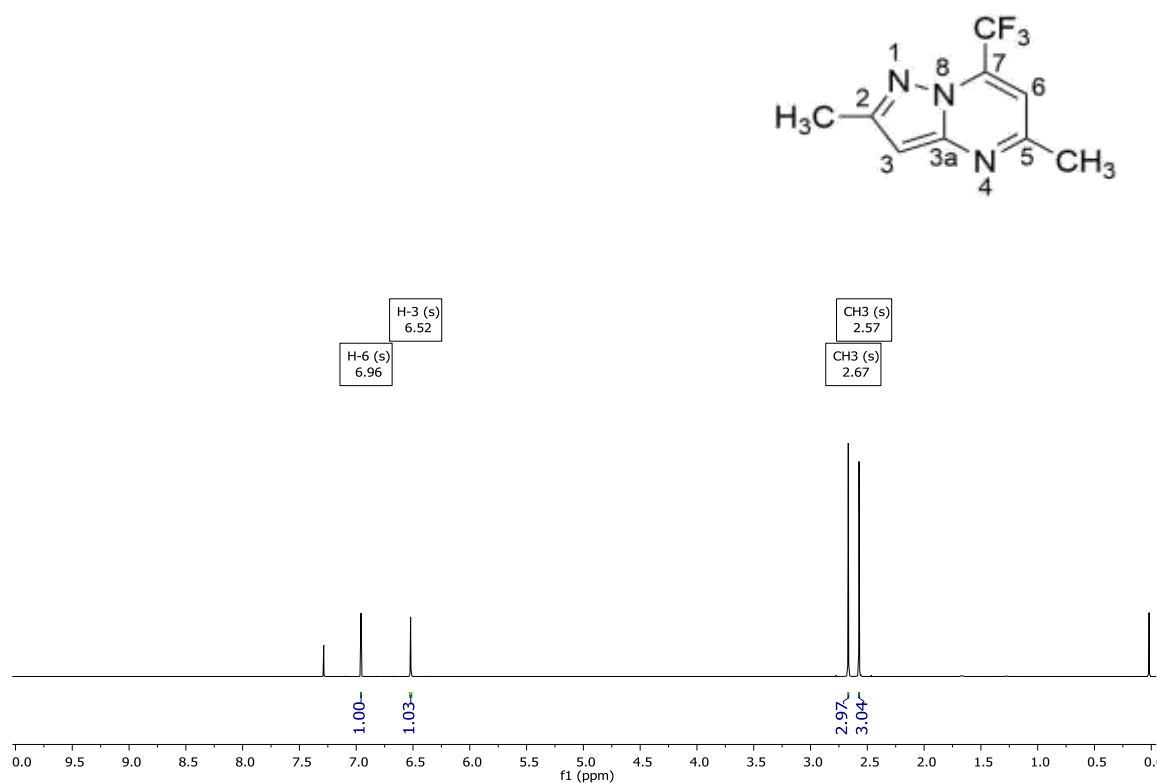

**Figure S1.**  $^1\text{H}$  NMR spectra at 600 MHz in  $\text{CDCl}_3$  of compound **3a**.

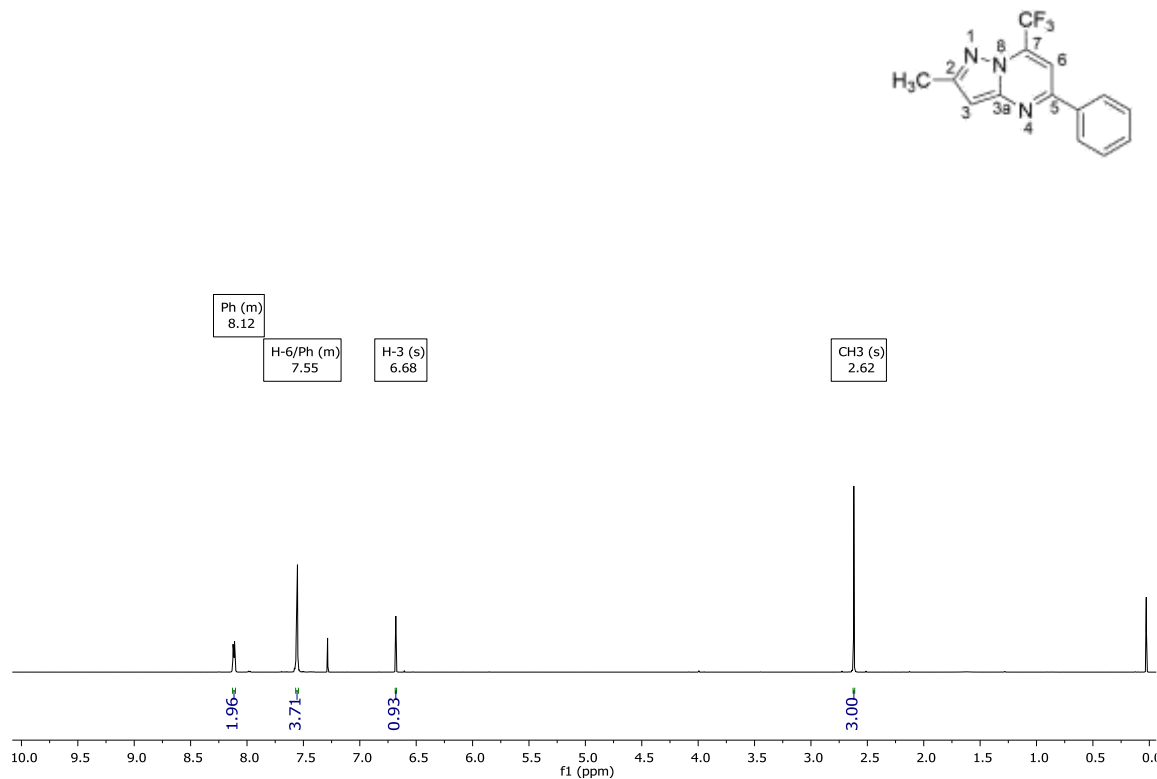

**Figure S2.**  $^1\text{H}$  NMR spectra at 600 MHz in  $\text{CDCl}_3$  of compound **3b**.

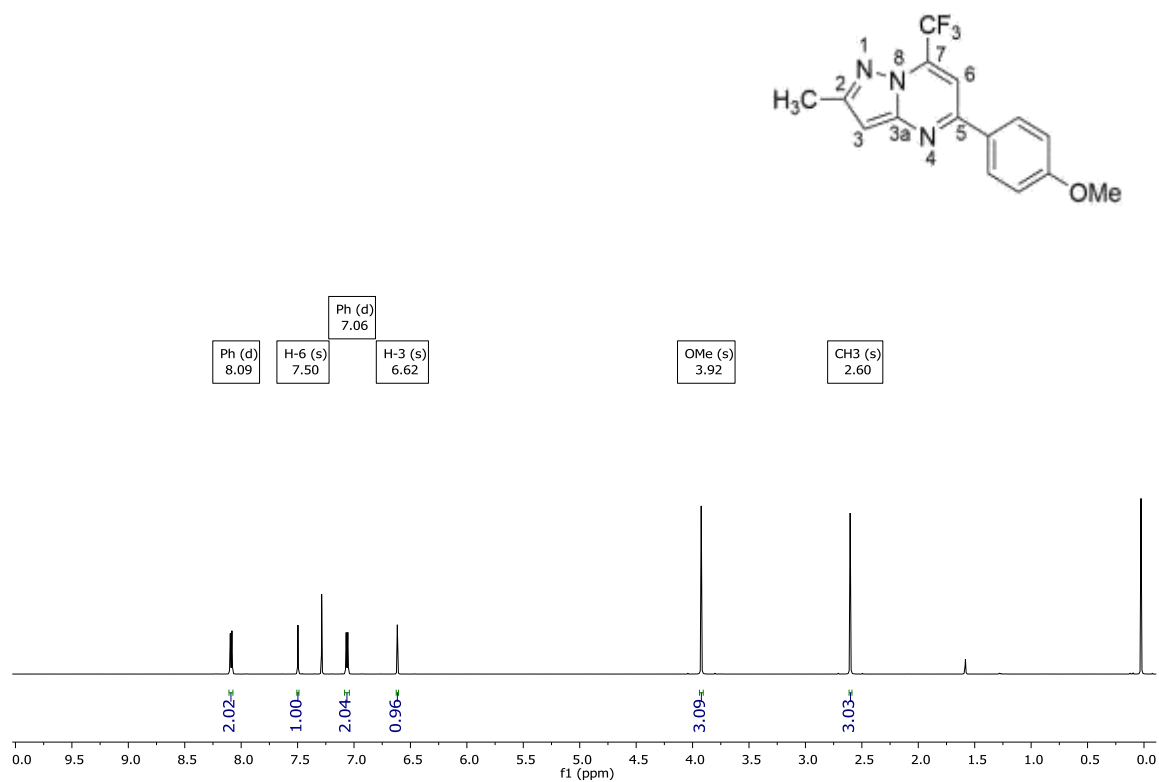

**Figure S3.**  $^1\text{H}$  NMR spectra at 600 MHz in  $\text{CDCl}_3$  of compound **3c**.

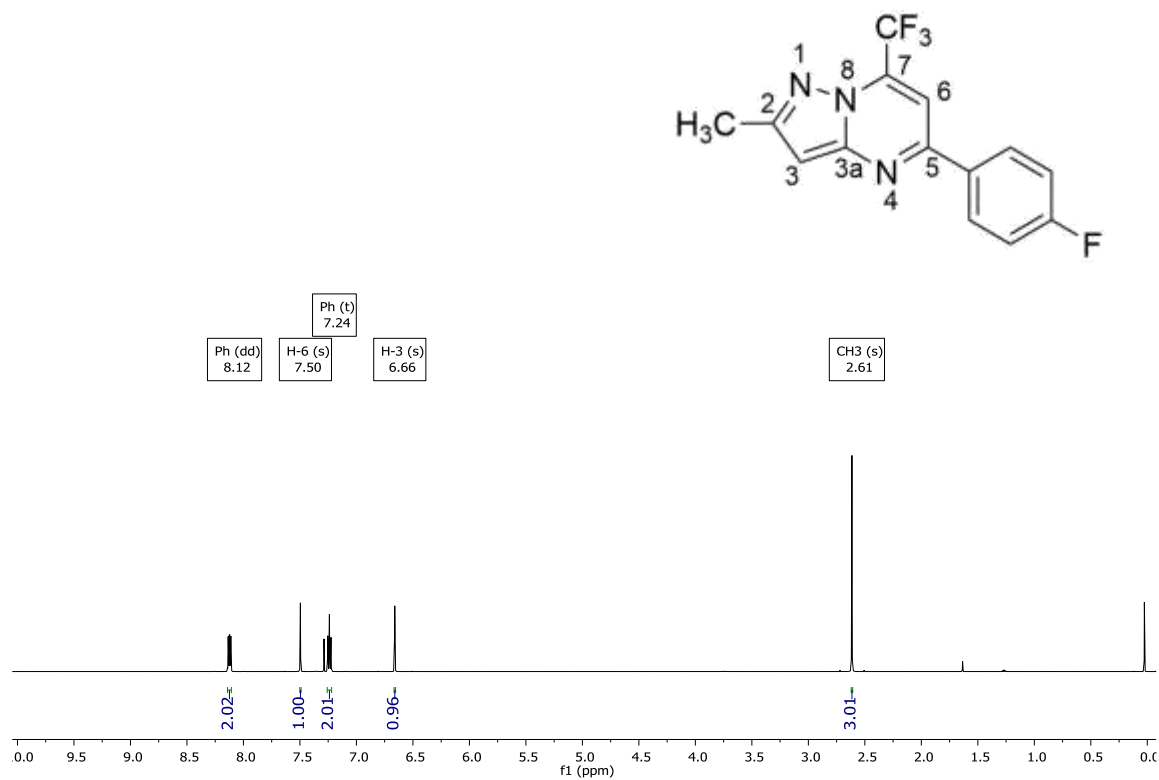

**Figure S4.**  $^1\text{H}$  NMR spectra at 600 MHz in  $\text{CDCl}_3$  of compound **3d**.

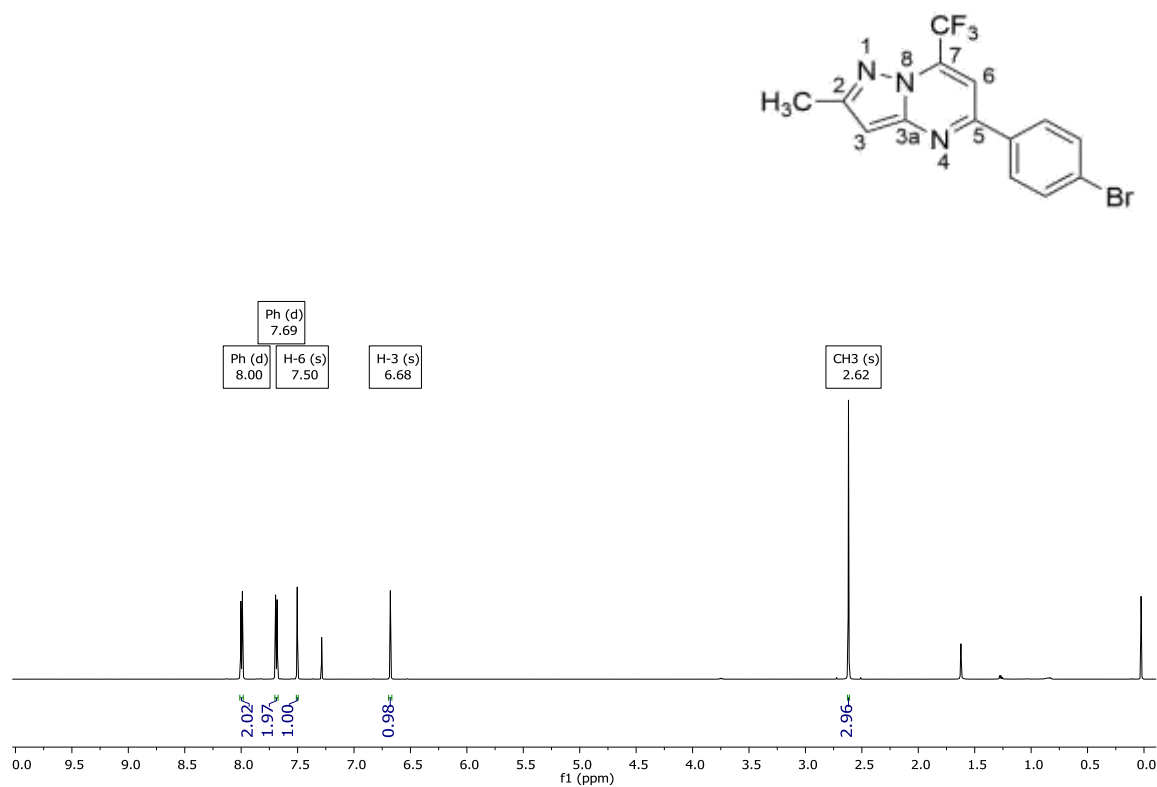

**Figure S5.**  $^1\text{H}$  NMR spectra at 600 MHz in  $\text{CDCl}_3$  of compound **3e**.

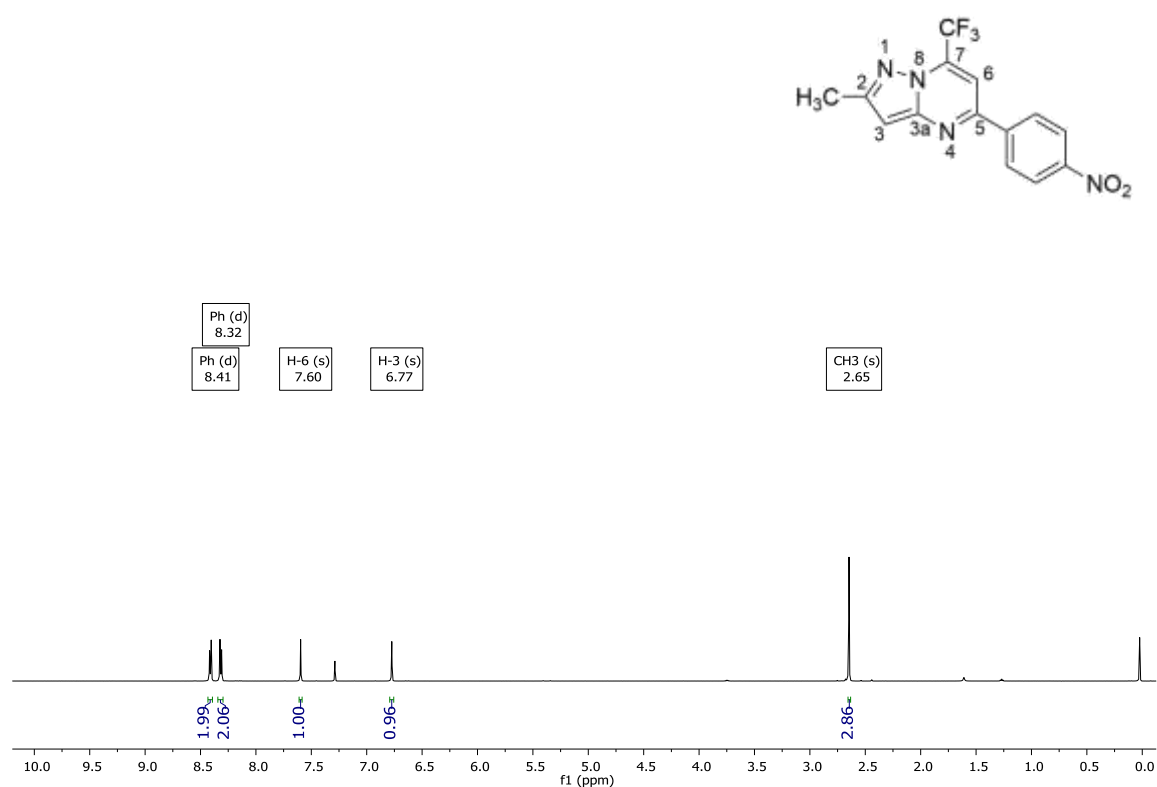

**Figure S6.**  $^1\text{H}$  NMR spectra at 600 MHz in  $\text{CDCl}_3$  of compound **3f**.

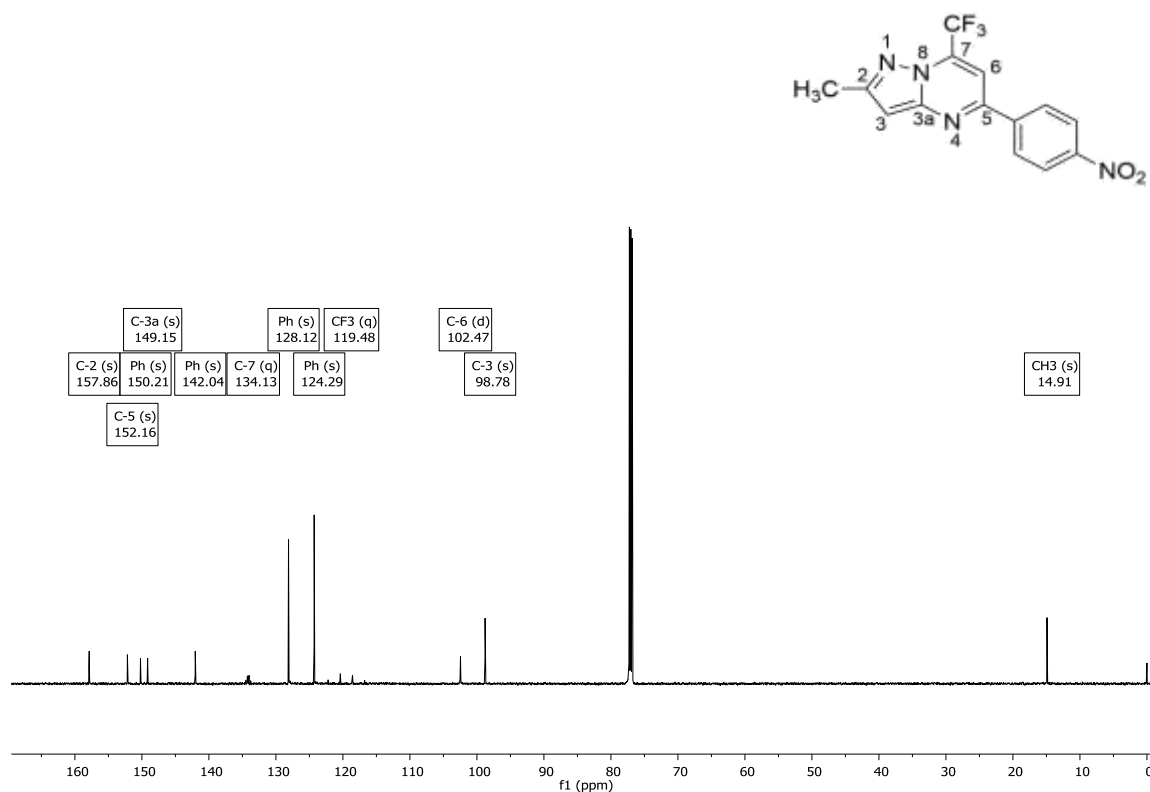

**Figure S7.** <sup>13</sup>C NMR spectra at 600 MHz in CDCl<sub>3</sub> of compound **3f**.

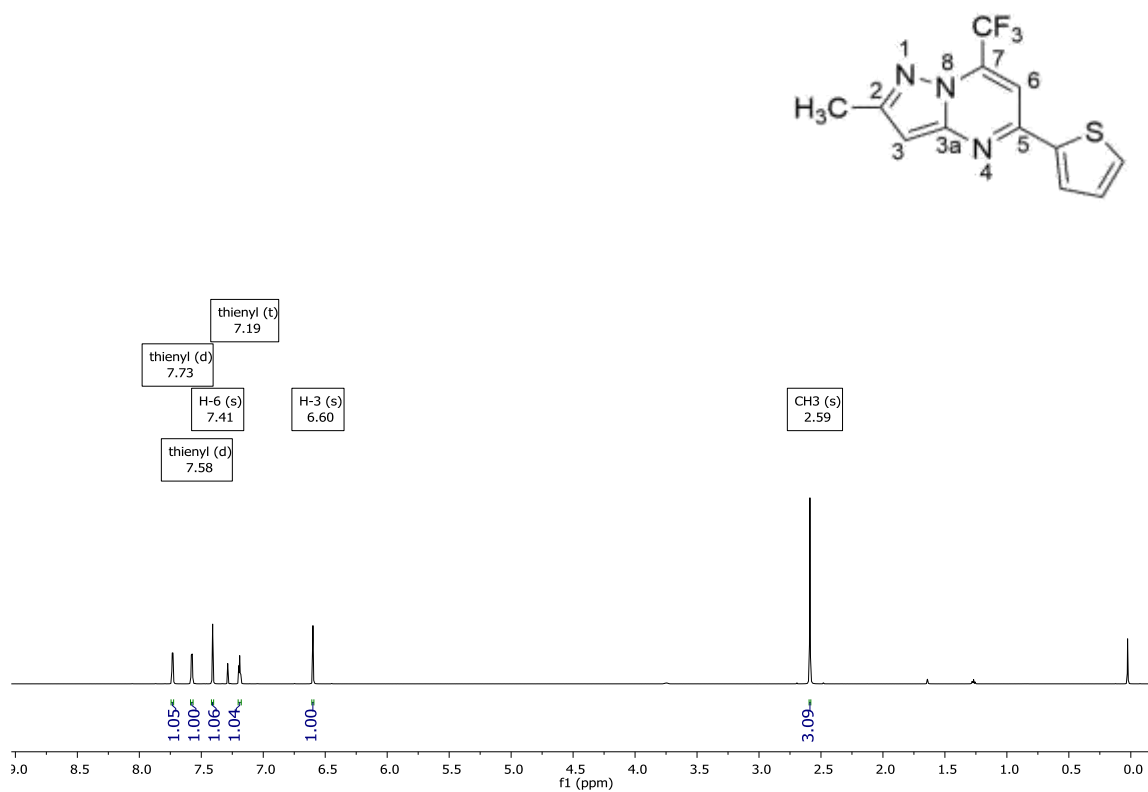

**Figure S8.** <sup>1</sup>H NMR spectra at 600 MHz in CDCl<sub>3</sub> of compound **3g**.

### 3. Photophysical analysis

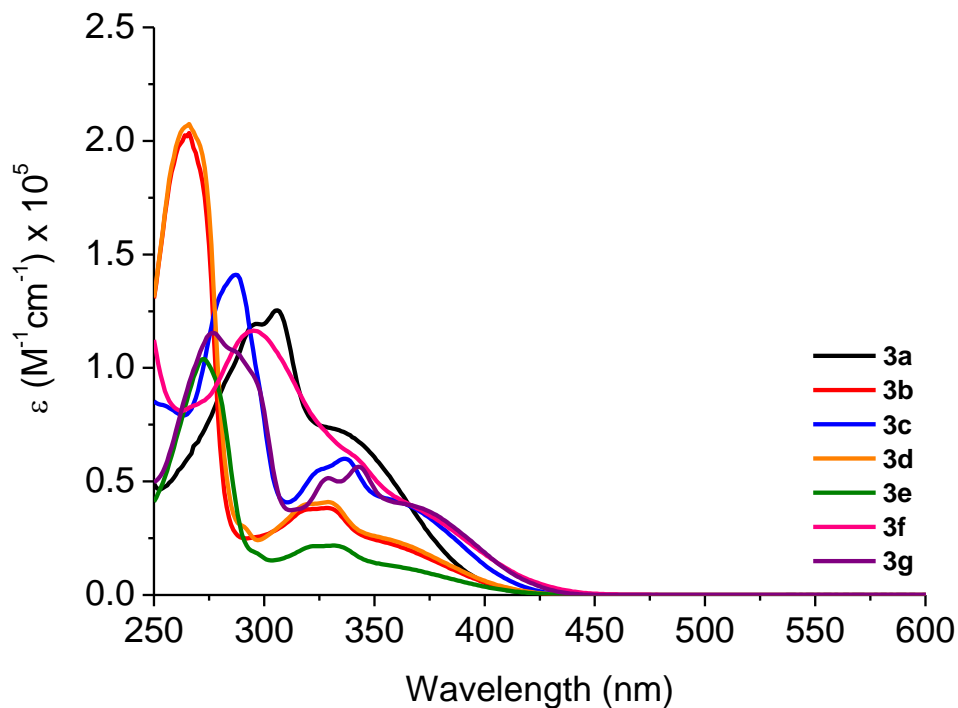

**Figure S9.** UV-Vis spectra of compounds **3a-g** in  $\text{CH}_3\text{CN}$  solution.

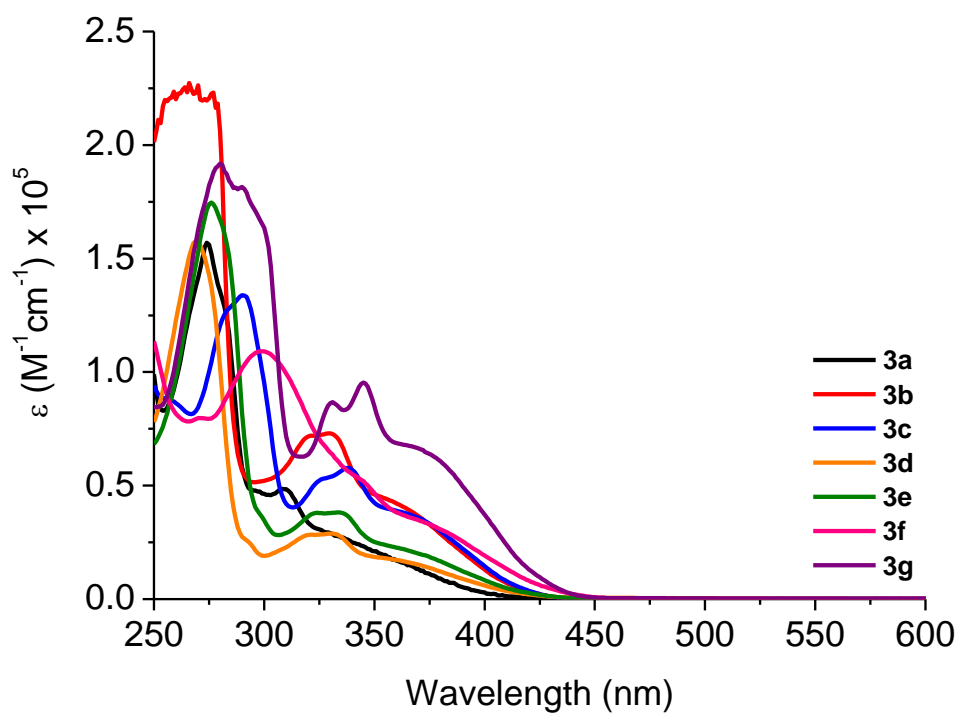

**Figure S10.** UV-Vis spectra of compounds **3a-g** in  $\text{CHCl}_3$  solution.



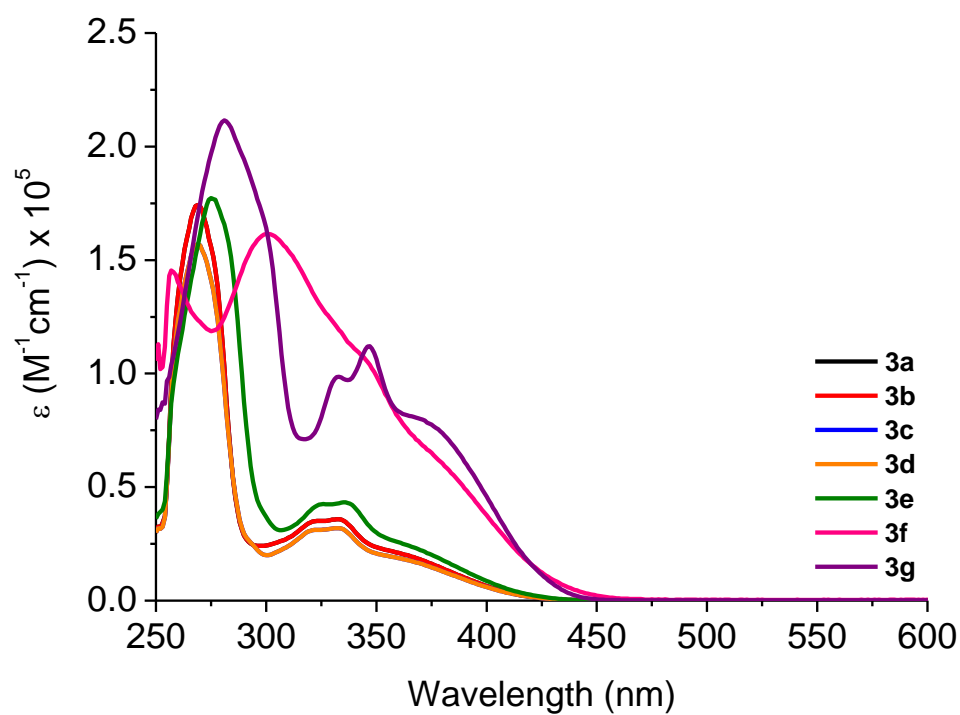

**Figure S11.** UV-Vis spectra of compounds **3a-g** in DMSO solution.

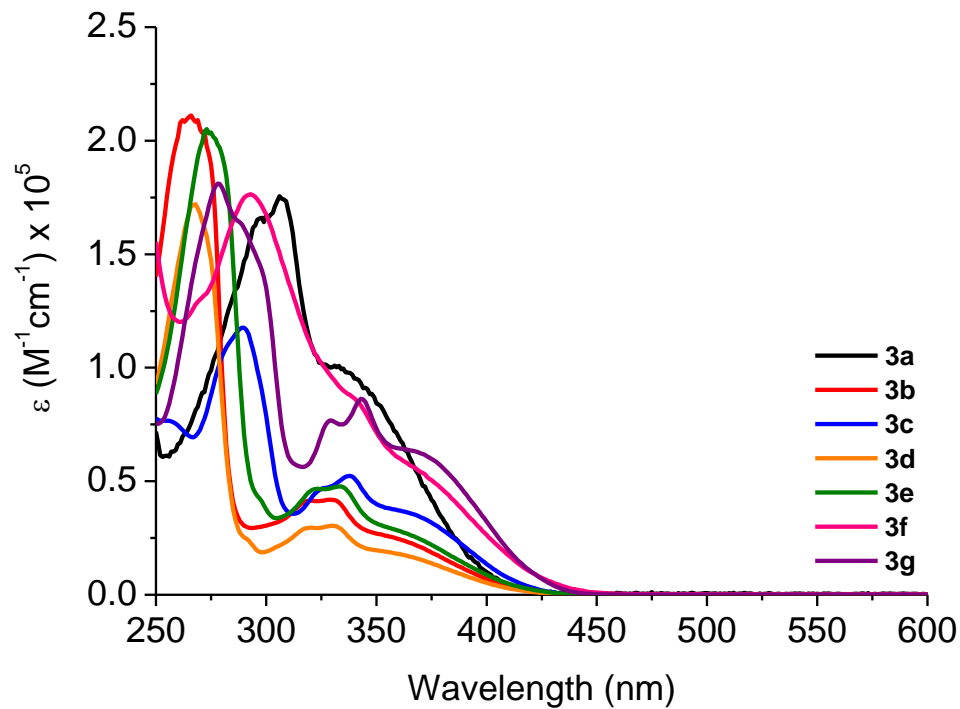

**Figure S12.** UV-Vis spectra of compounds **3a-g** in EtOH solution.

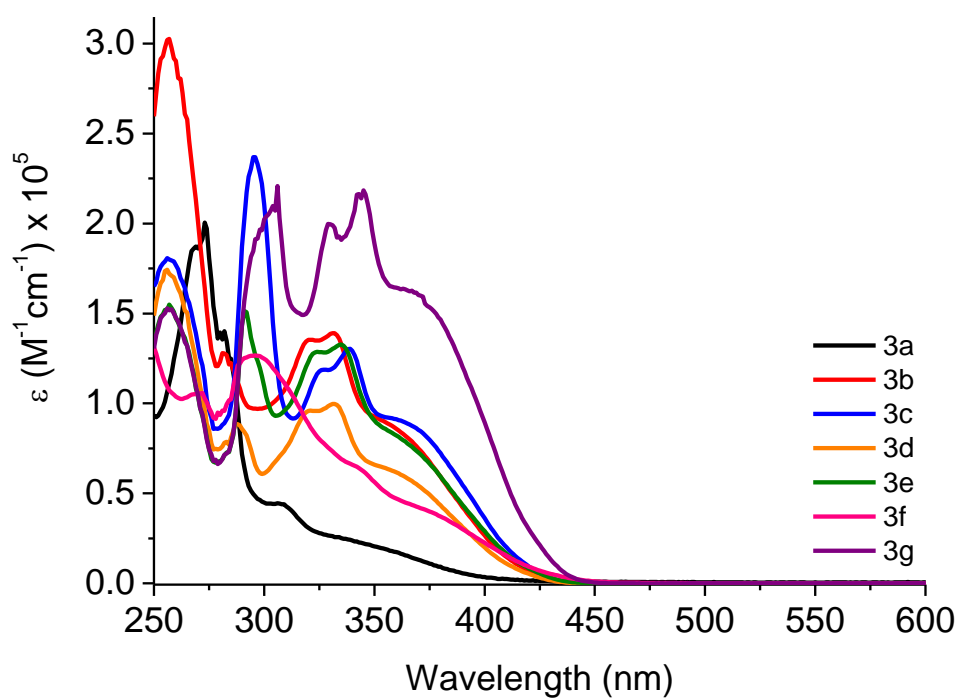

Figure S13. UV-Vis spectra of compounds **3a-g** in THF solution.

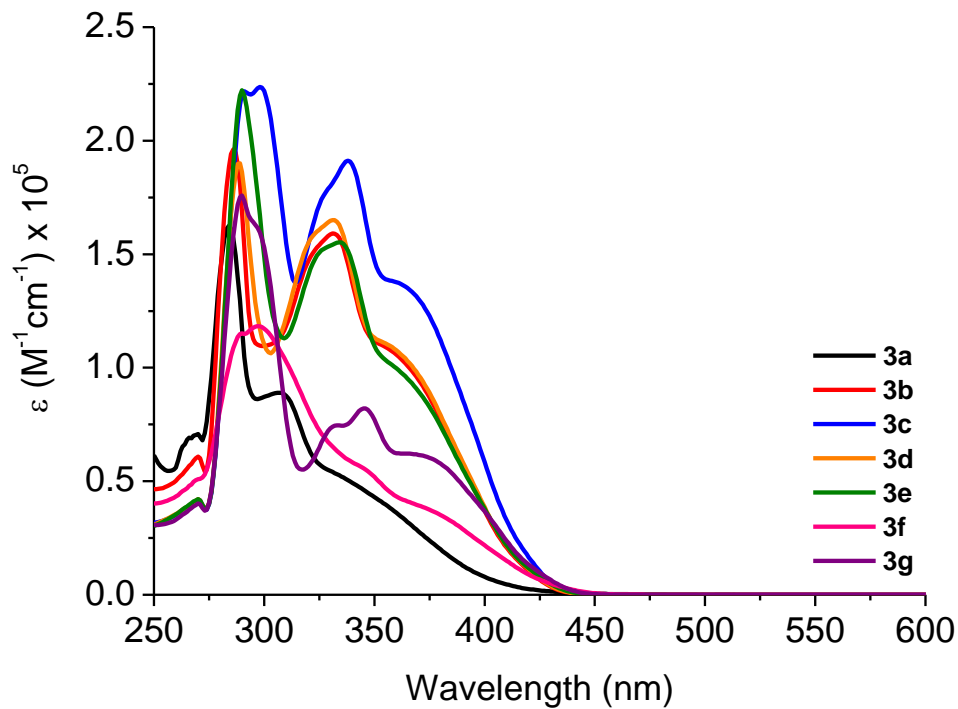

Figure S14. UV-Vis spectra of compounds **3a-g** in Toluene solution.

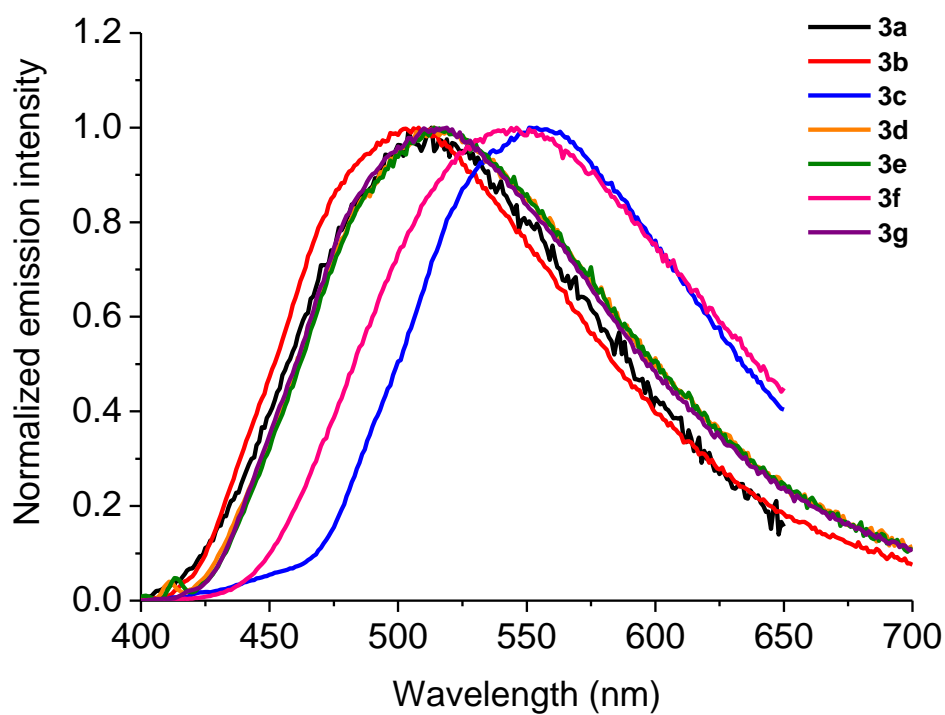

**Figure S15.** Steady-state fluorescence emission spectra of compounds **3a-g** in  $\text{CH}_3\text{CN}$  solution.

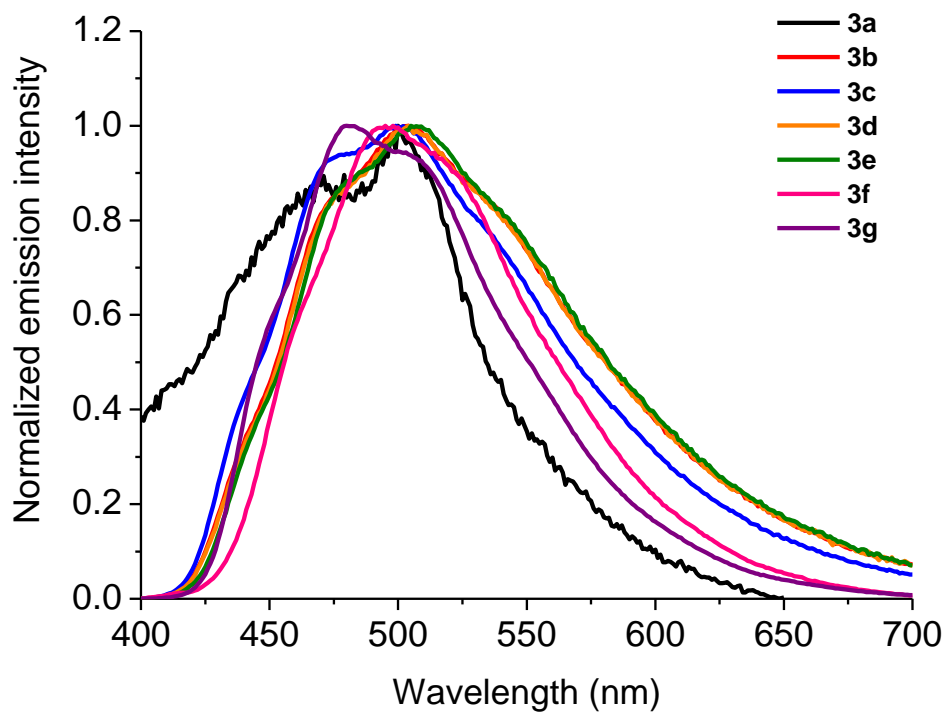

**Figure S16.** Steady-state fluorescence emission spectra of compounds **3a-g** in  $\text{CHCl}_3$  solution.

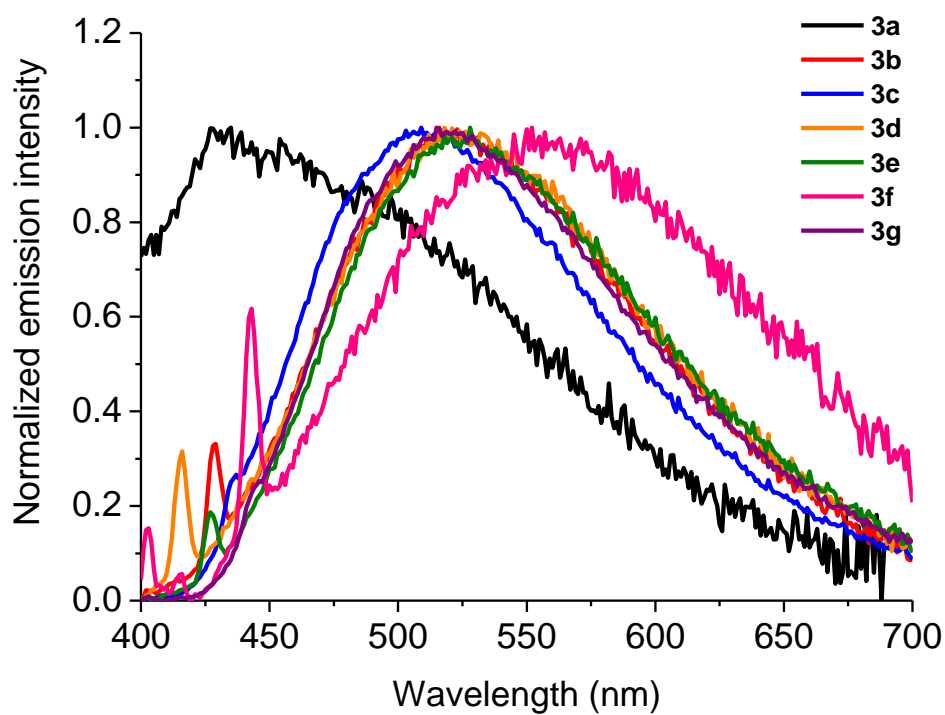

**Figure S17.** Steady-state fluorescence emission spectra of compounds **3a-g** in DMSO solution.

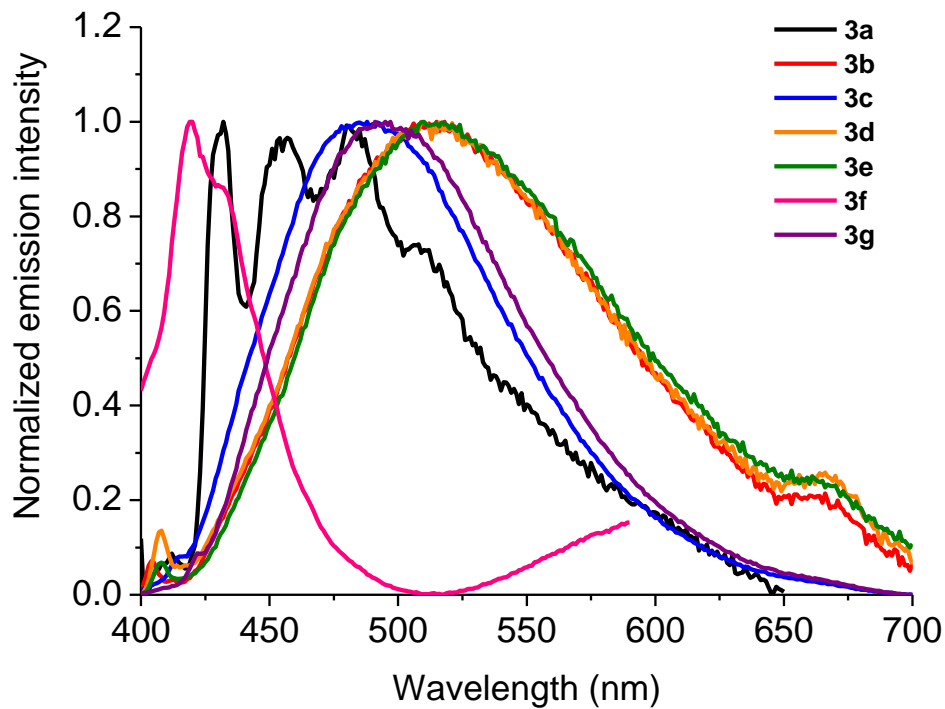

**Figure S18.** Steady-state fluorescence emission spectra of compounds **3a-g** in EtOH solution.

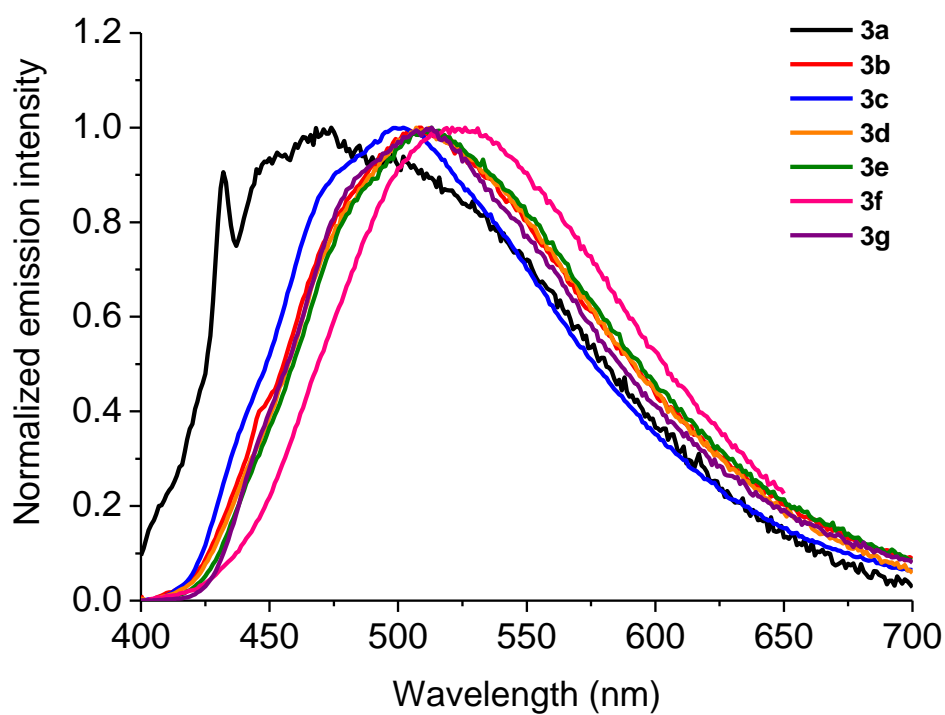

**Figure S19.** Steady-state fluorescence emission spectra of compounds **3a-g** in THF solution.

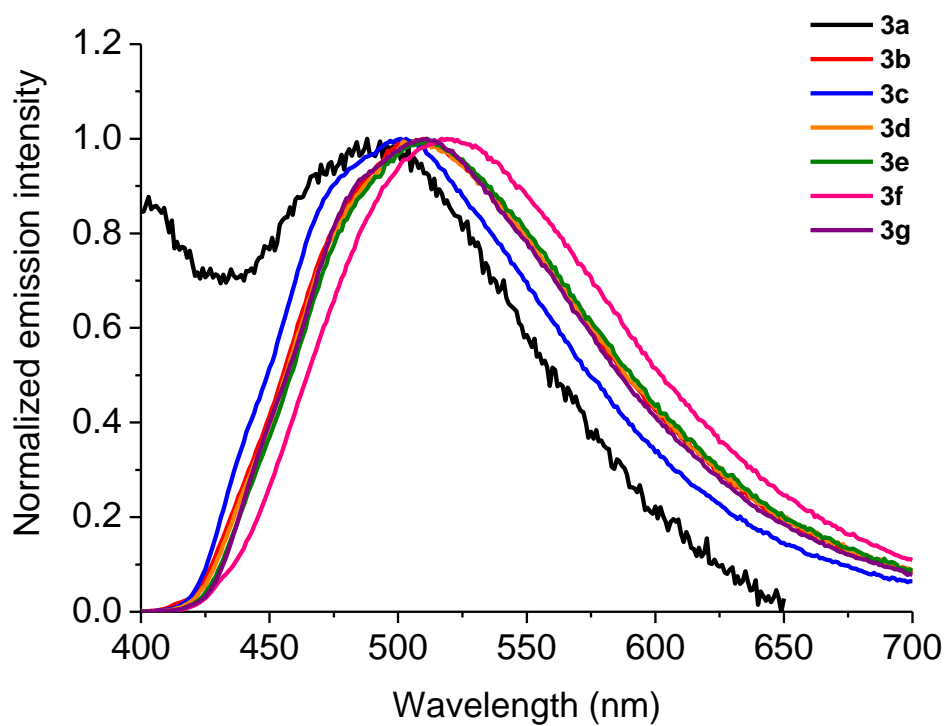

**Figure S20.** Steady-state fluorescence emission spectra of compounds **3a-g** in Toluene solution.

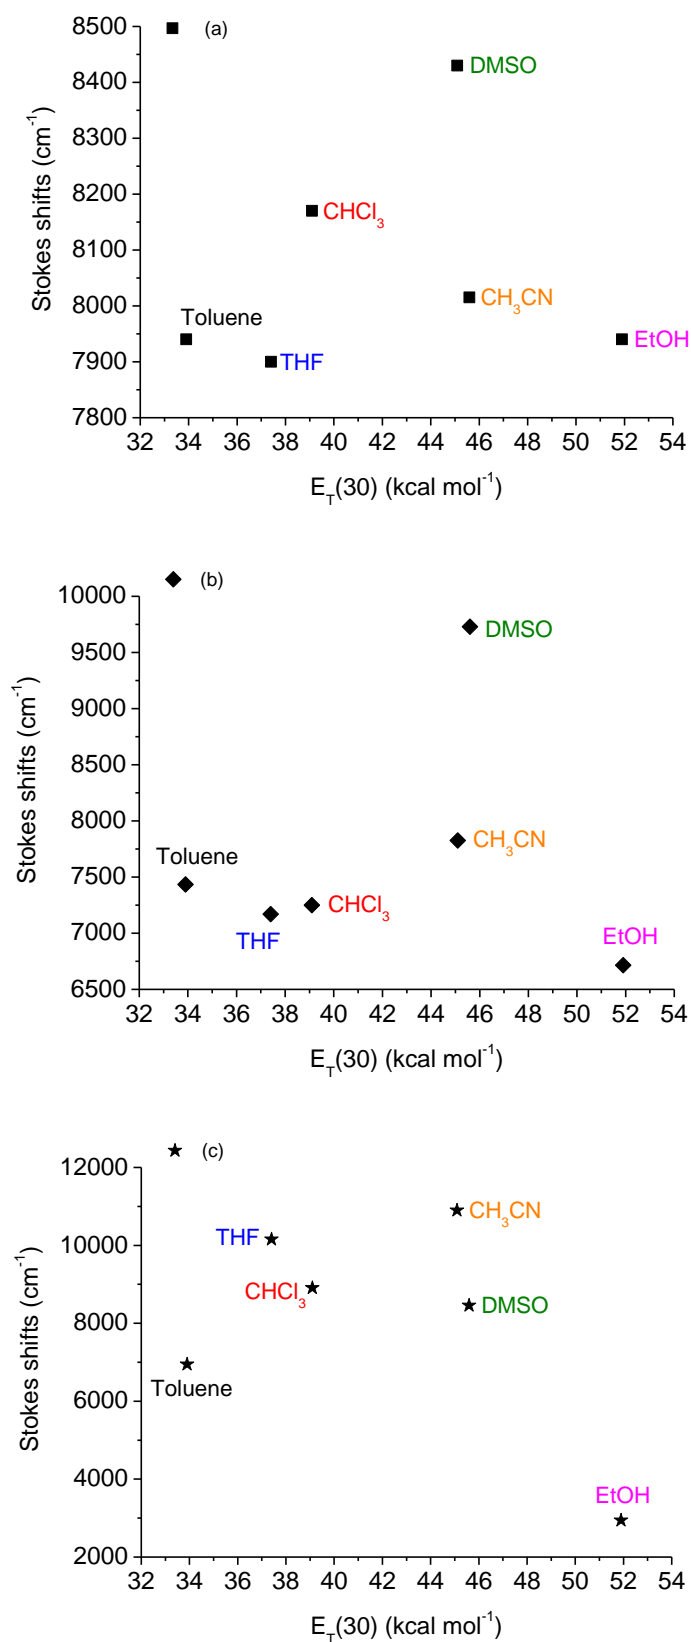

**Figure S21.** Lippert-Mataga plots relationship of  $E_T(30)$  versus Stokes shifts ( $\text{cm}^{-1}$ ) of compounds (a) 3b, (b) 3c and (c) 3f, respectively.

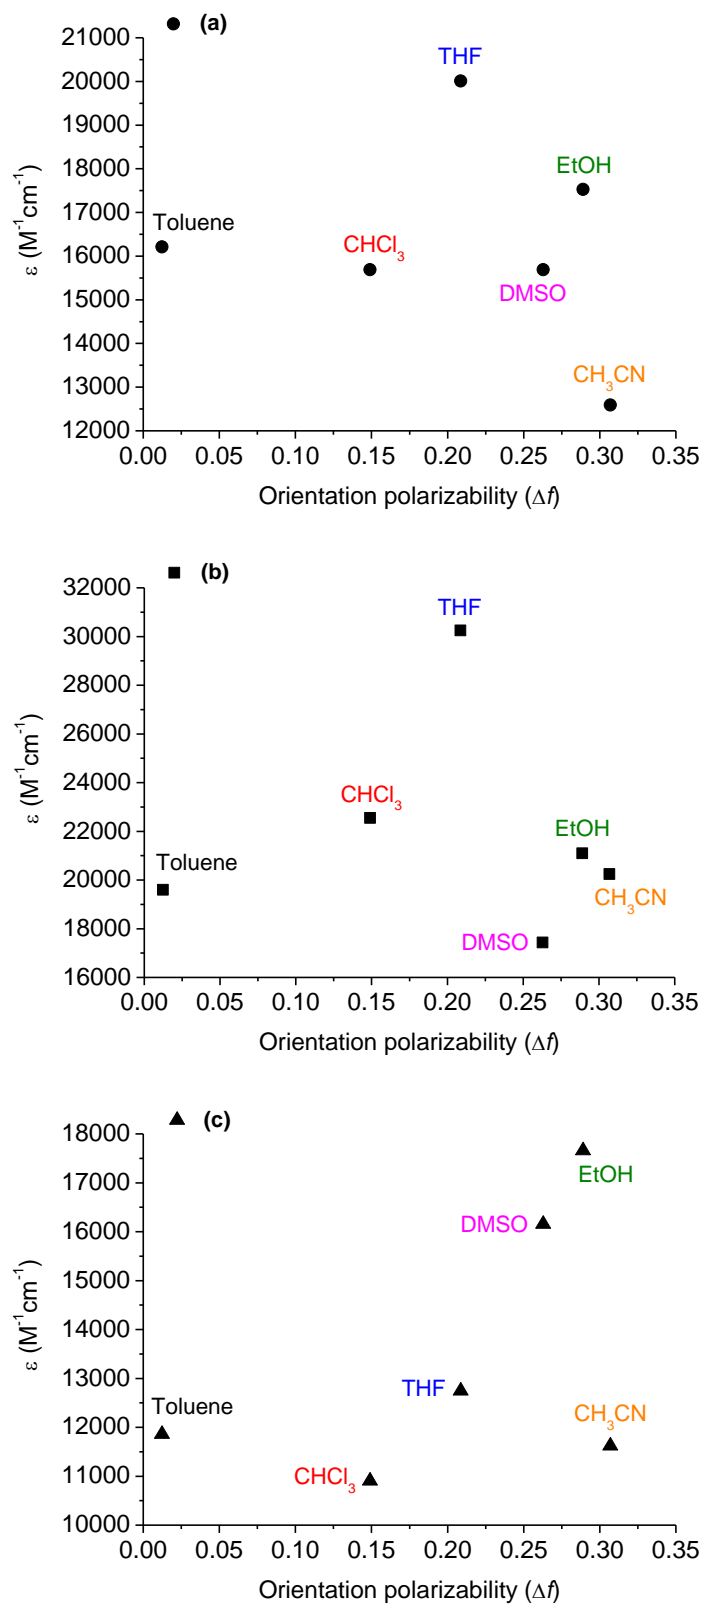

**Figure S22.** Lippert-Mataga plots relationship of orientation polarizability ( $\Delta f$ ) versus  $\epsilon$  ( $M^{-1} cm^{-1}$ ) of compounds (a) **3b**, (b) **3c** and (c) **3f**, respectively.

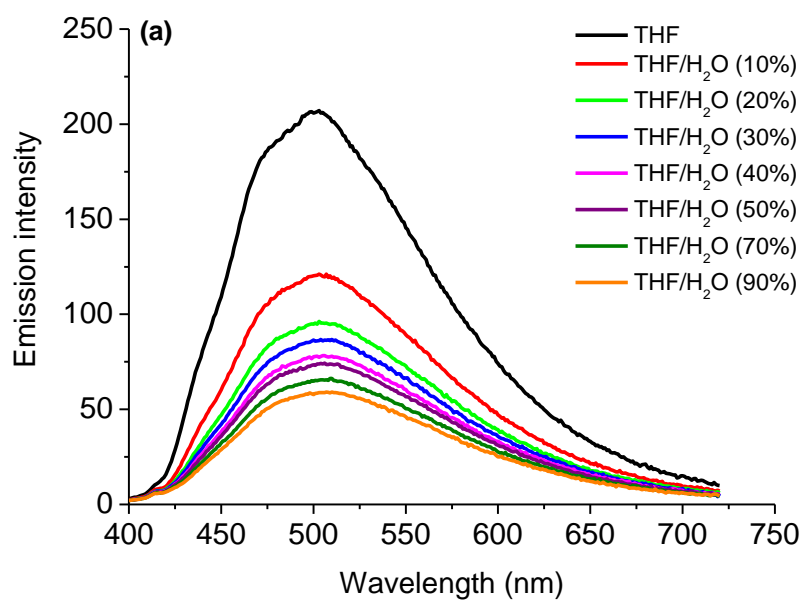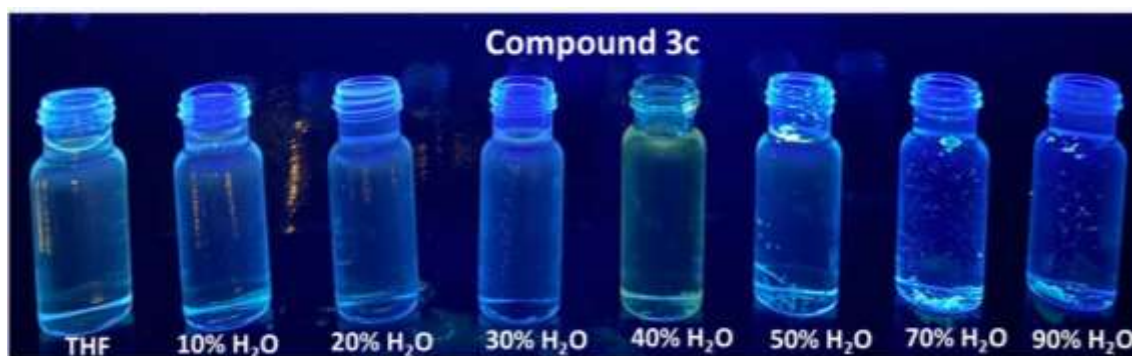

**Figure S23.** (a) Fluorescence emission spectra of compound **3c** and (b) photograph of compound **3c** solutions in THF/water mixture different water fractions (0 to 90%) under illumination of UV lamp (365 nm) light.



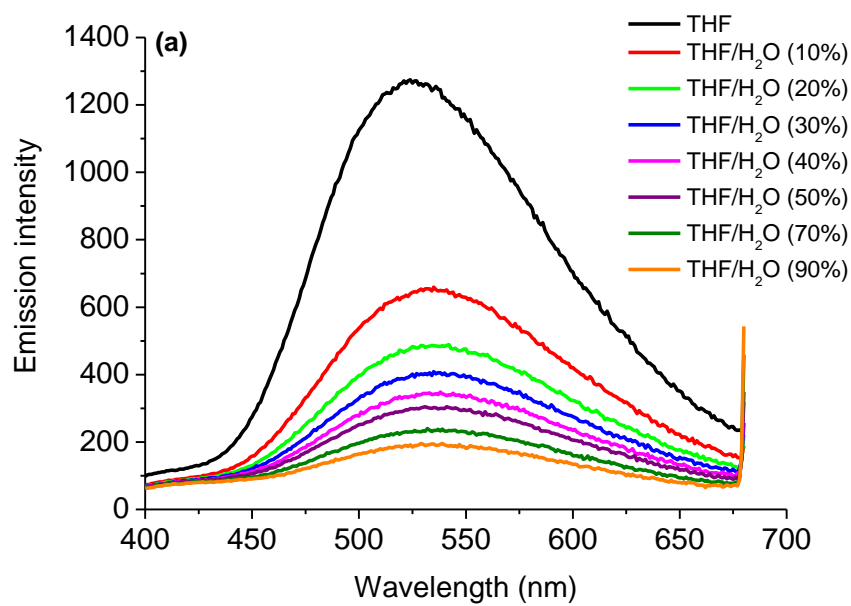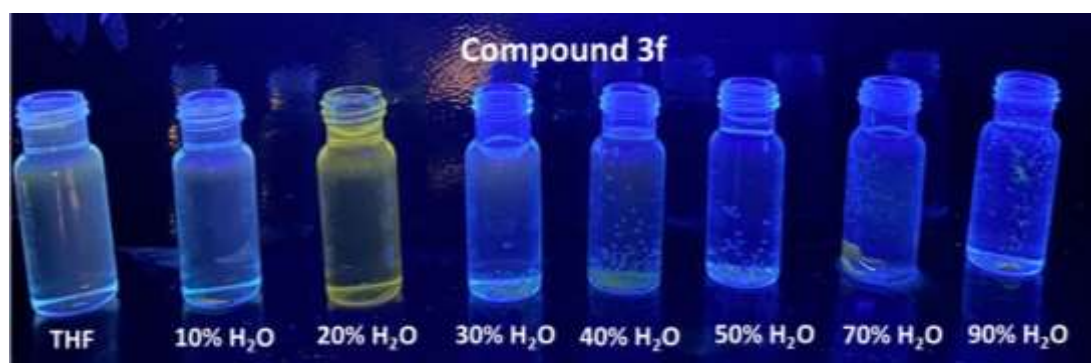

**Figure S24.** (a) Fluorescence emission spectra of compound **3f** and (b) photograph of compound **3f** solutions in THF/water mixture different water fractions (0 to 90%) under illumination of UV lamp (365 nm) light.

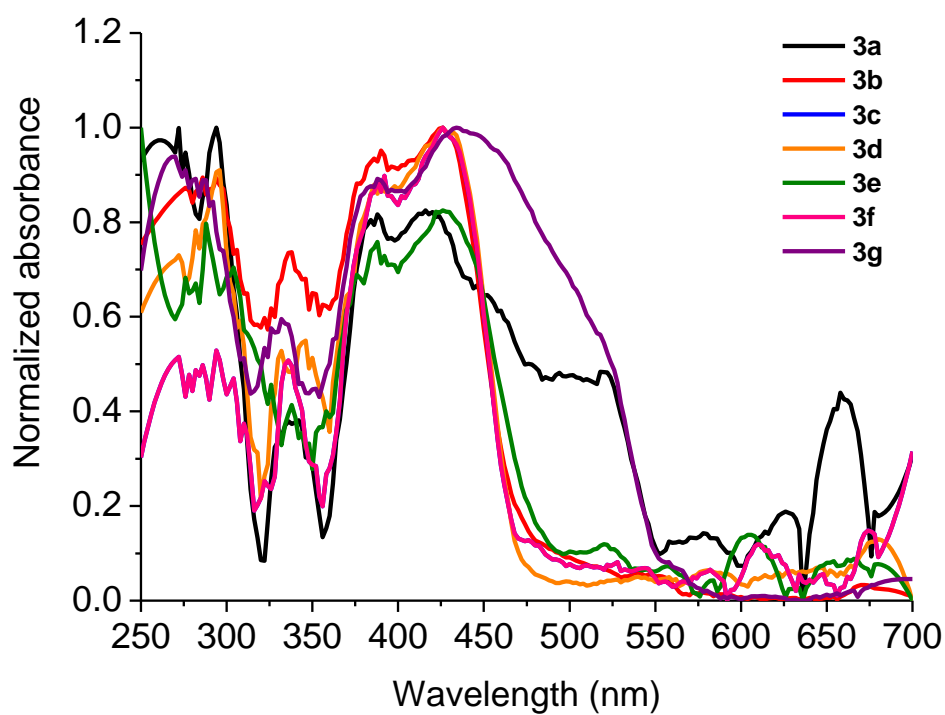

**Figure S25.** Normalized absorbance spectra of compounds **3a-g** in solid state.

#### 4. Thermal stability

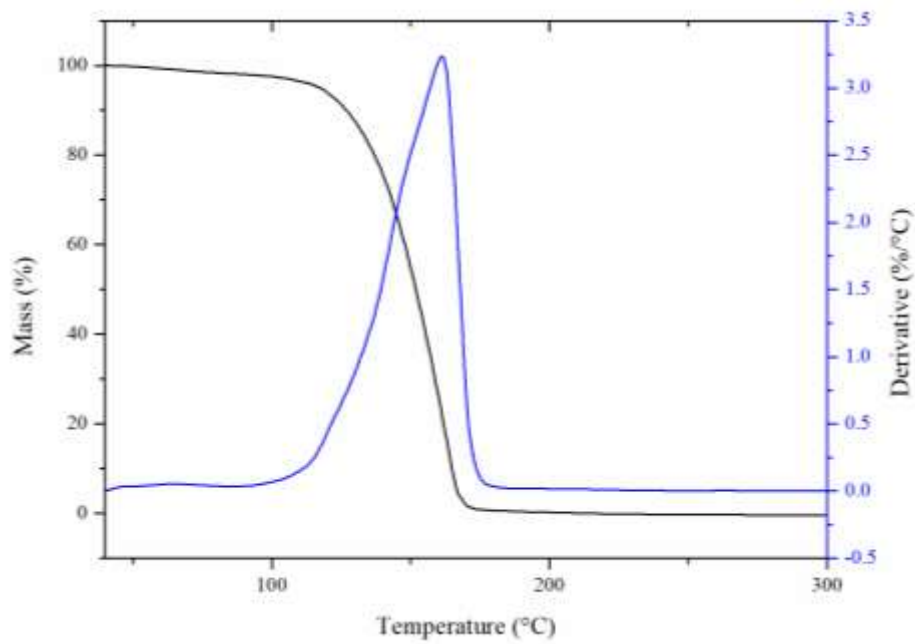

**Figure S26.** TGA curve of compound **3b**.

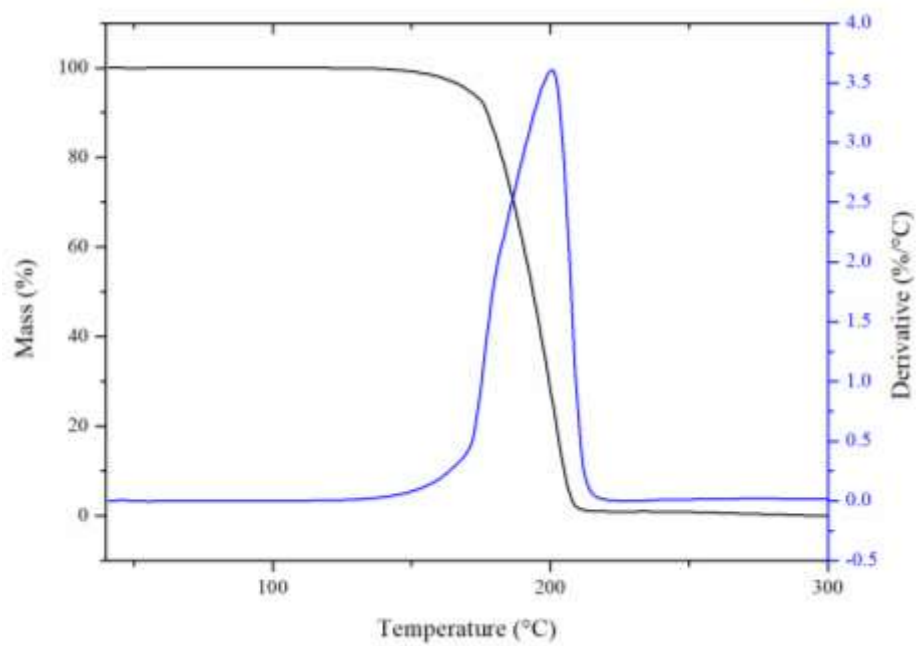

**Figure S27.** TGA curve of compound **3c**.

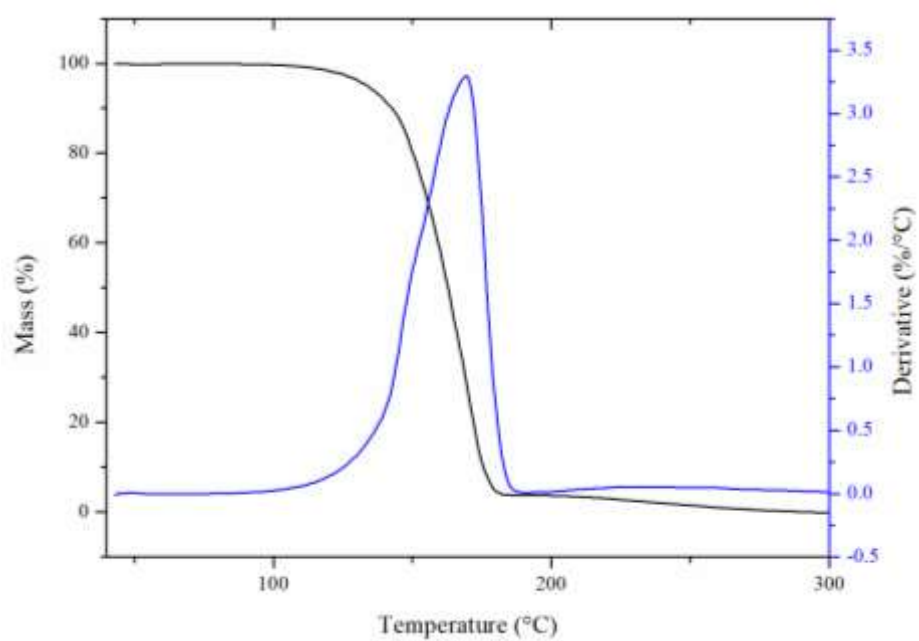

**Figure S28.** TGA curve of compound **3d**.

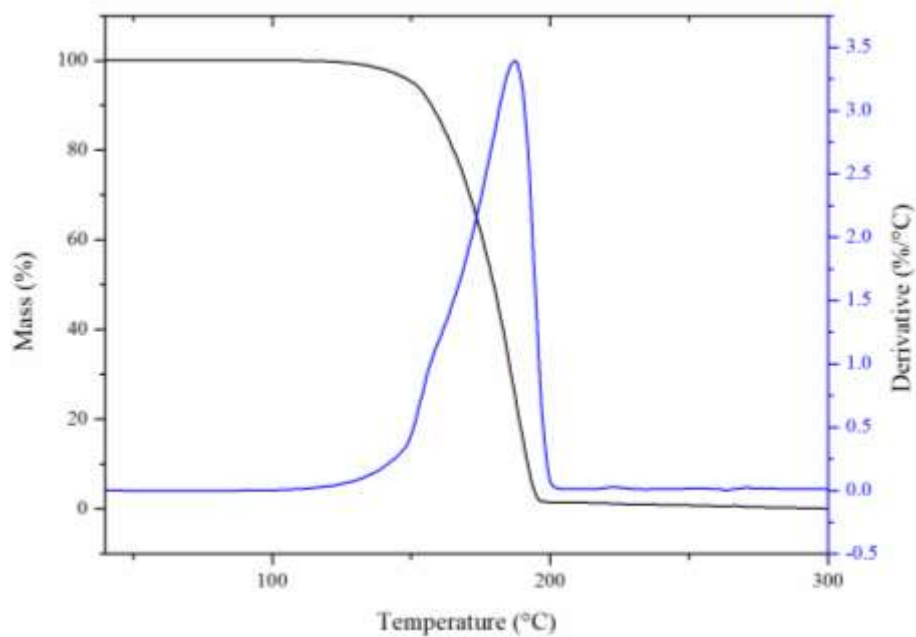

**Figure S29.** TGA curve of compound **3g**.

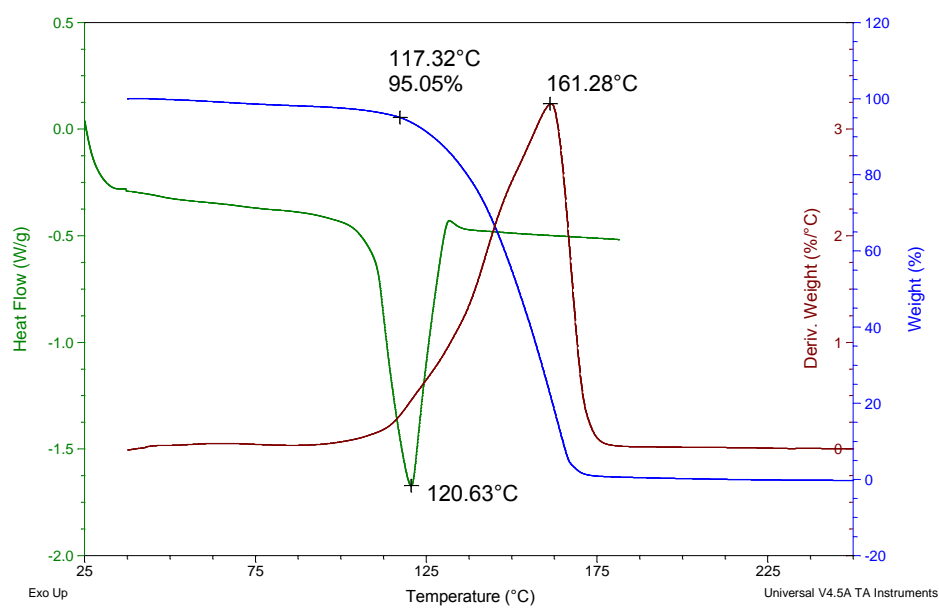

**Figure S30.** DSC/TGA/DTG curve of **3b** (first cycle).

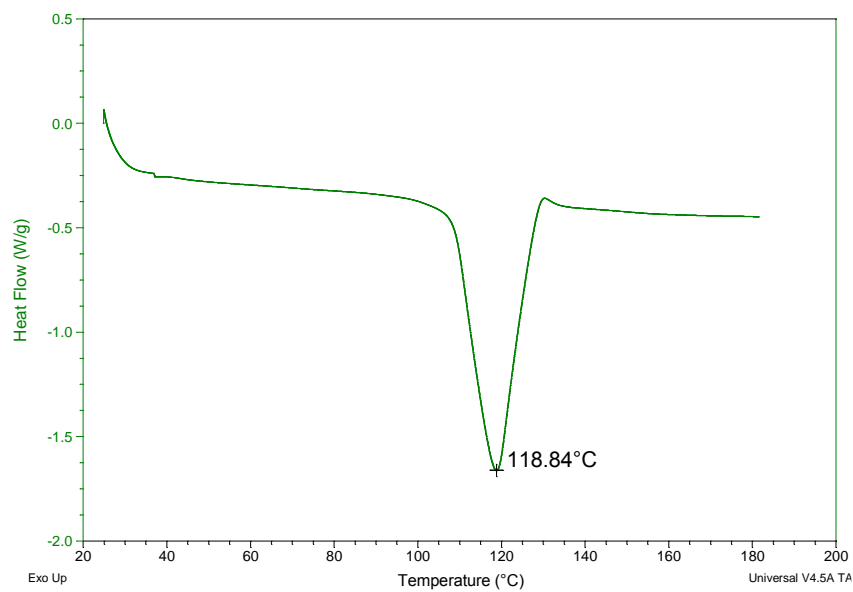

**Figure S31.** DSC curve of **3b** (second cycle).

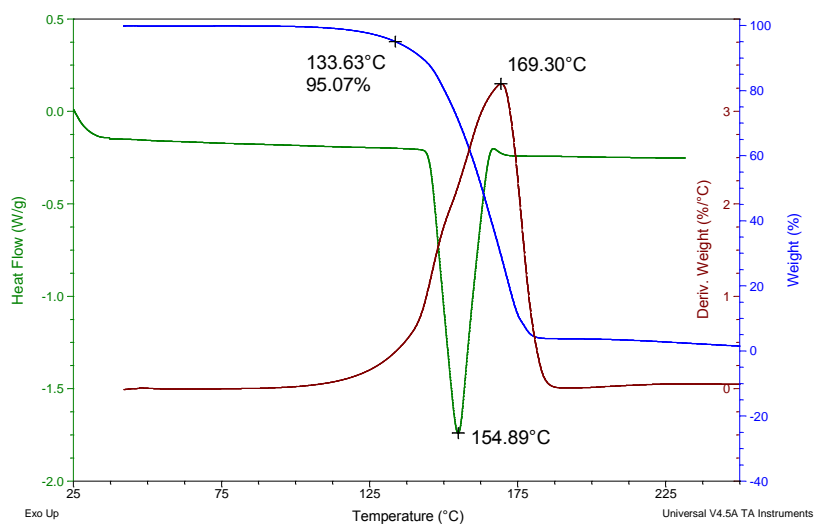

**Figure S32.** DSC/TGA/DTG curve of **3d** (first cycle).

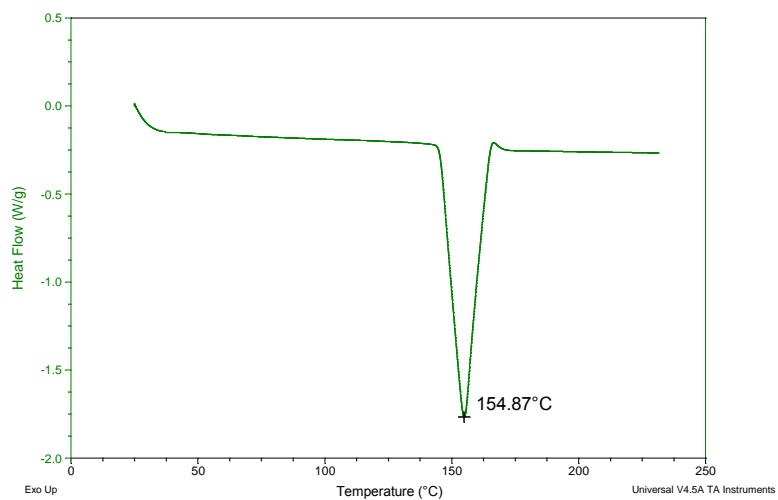

**Figure S33.** DSC curve of **3d** (second cycle).

## 5. HRMS analysis of compound 3f.

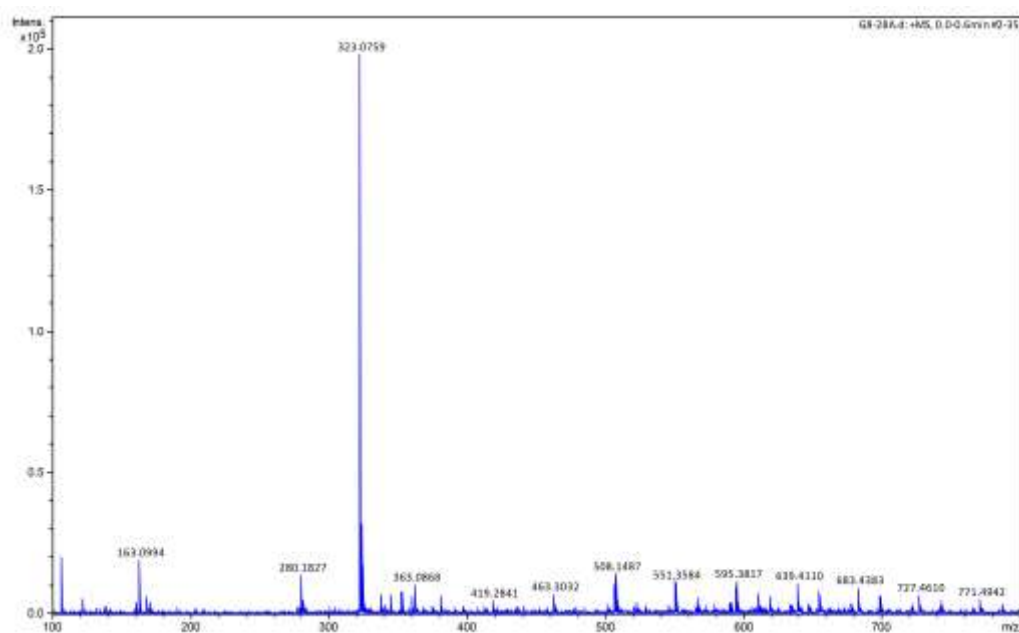

Figure S34. Spectrum obtained from compound 3f.

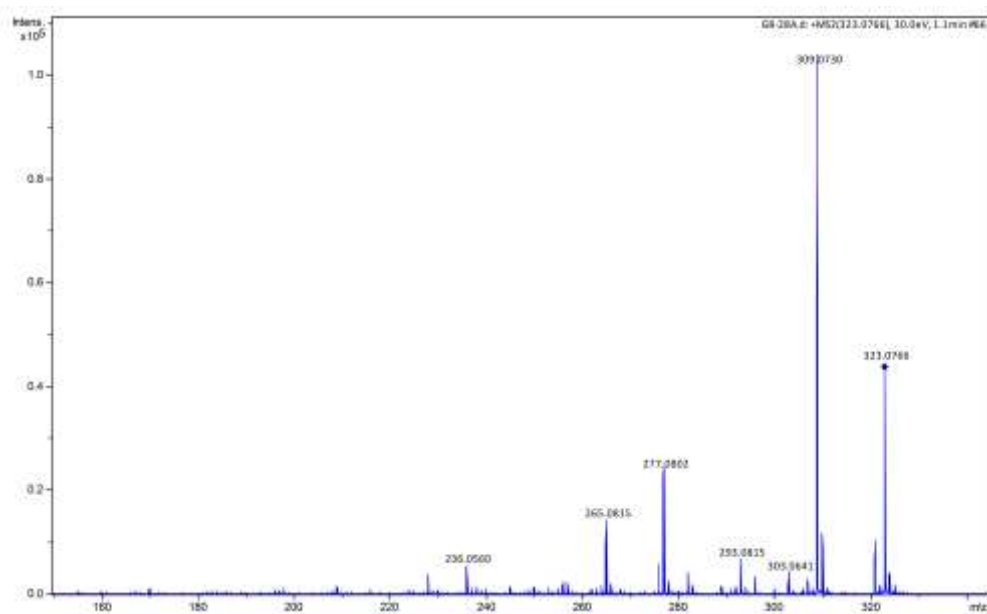

Figure S35. Spectrum obtained from the fragmentation of the m/z 323 ion of compound 3f.

## 6. References

- [1] A.W.T. Bristow, K.S. Webb, Intercomparison study on accurate mass measurement of small molecules in mass spectrometry, *J. Am. Soc. Mass Spectrom.* 14 (2003) 1086–1098. [https://doi.org/10.1016/S1044-0305\(03\)00403-3](https://doi.org/10.1016/S1044-0305(03)00403-3).
